# Supplementary material
Source: publisher site journal article supplement (https://www.dovepress.com/article/283147)
Supplement: Supplementary file 1 [file get_supplementary_file.php]

# Overcoming radiation resistance by iron-platinum metal alloy nanoparticles in human copper transport 1-overexpressing cancer cells via mitochondrial disturbance

Tsung-Lin Tsai, 1, 2 Yu-Hsuan Lai, 3, 4 Helen H. W. Chen, 1, 2, 4, * Wu-Chou Su, 1, 2 , *

1Center of Applied Nanomedicine, National Cheng Kung University, Tainan 701, Taiwan; 2Department of Oncology, National Cheng Kung University Hospital, College of Medicine, National Cheng Kung University, Tainan 701, Taiwan; 3Institute of Clinical Medicine, College of Medicine, National Cheng Kung University, Tainan 701, Taiwan; 4Department of Radiation Oncology, National Cheng Kung University Hospital, College of Medicine, National Cheng Kung University, Tainan 701, Taiwan

Correspondence: Wu-Chou Su

Rm. 6065, 6F., No. 35, Xiaodong Rd., North Dist., Tainan 704, Taiwan.

Tel +886-6-2353535#3120

Fax +886-6-2084112

Email sunnysu@mail.ncku.edu.tw

Correspondence: Helen H. W. Chen

No. 138, Sheng Li Rd., North Dist., Tainan 704, Taiwan.

Tel +886-6-2353535#2461

Fax +886-6-2359333

Email helen@mail.ncku.edu.tw

**
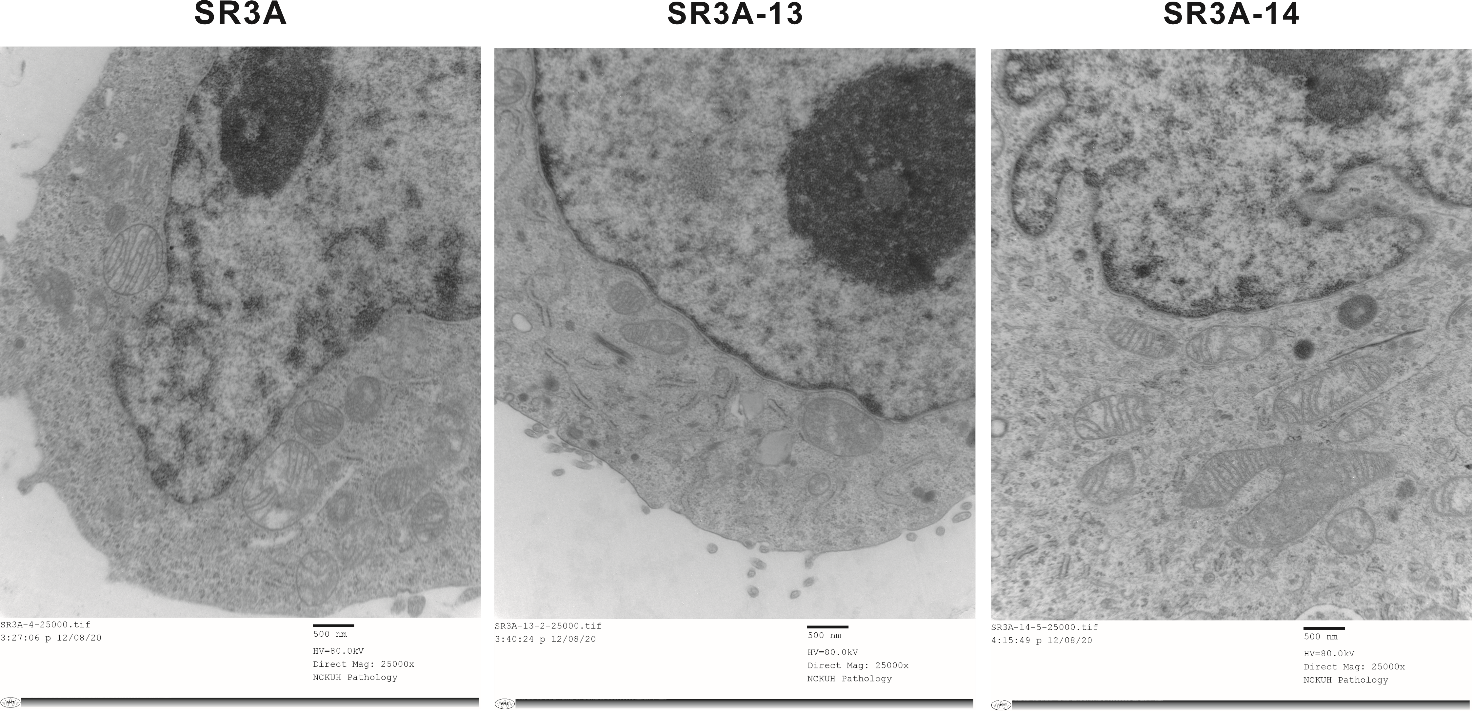
**

**Supplementary Fig. S1** Mitochondrial morphology and structure were intact in SR3A cells, SR3A-13 cells and SR3A-14 cells without FePt NPs treatment.


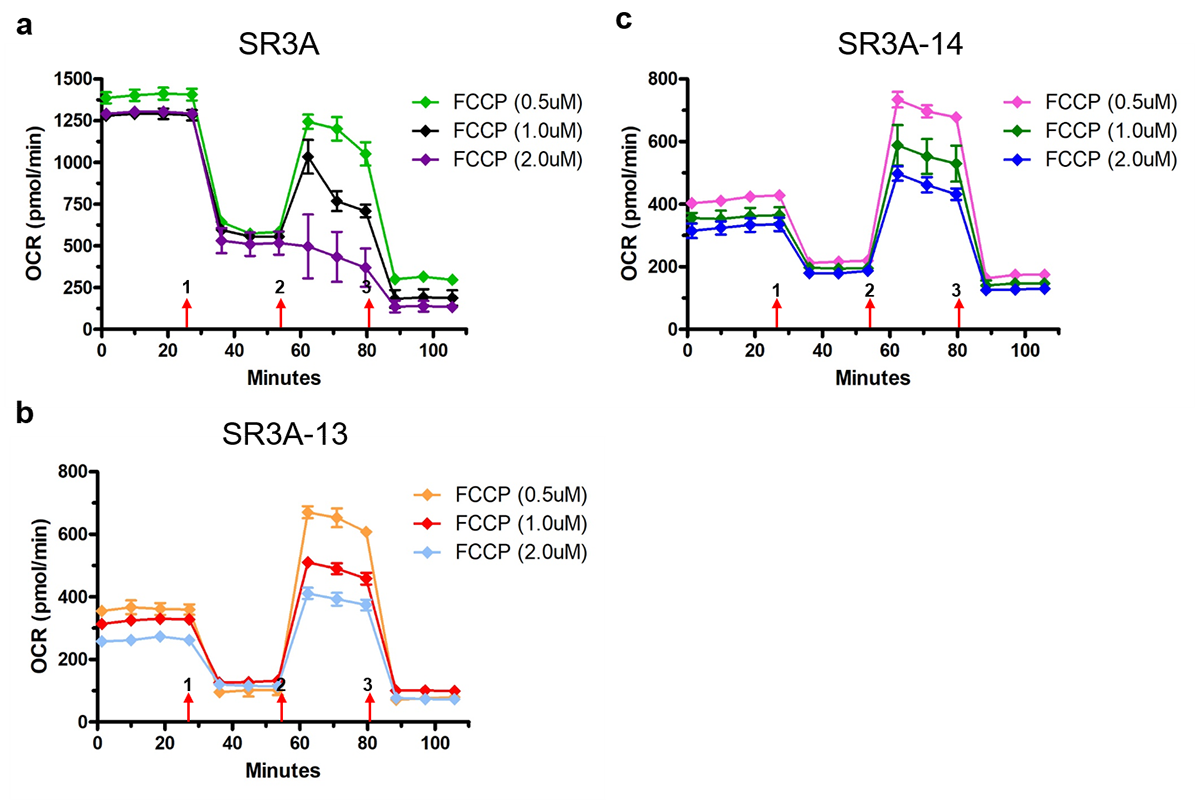


**Supplementary Fig. S2** Validation of different concentrations of FCCP (0.5, 1.0 and 2.0 μM) for optimizing the oxygen consumption rate in (**a**) SR3A, (**b**) SR3A-13 and (**c**) SR3A-14 cells.

**
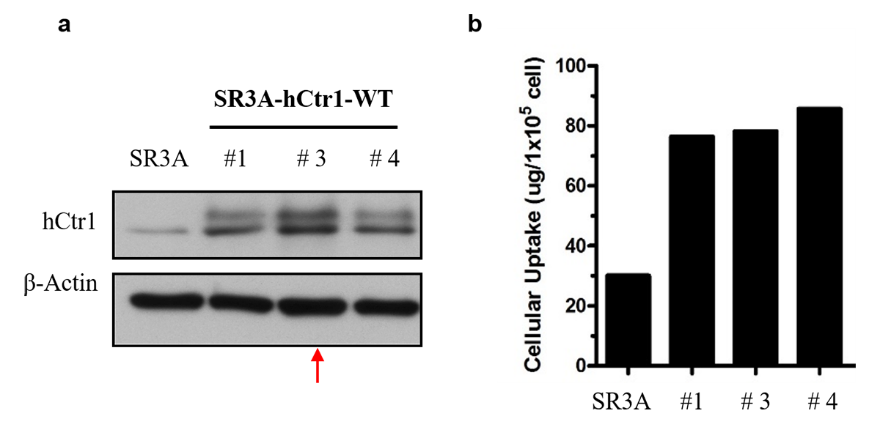
**

**Supplementary Fig. S3** Establishing stable clones of hCtr1-overexpressing cells by using *hCtr1*-transfected parental SR3A cells. (**a**) The expression level of hCtr1 was measured by western bolts in different selected clones. Clone #3 was selected and named as SR3A-hCtr1-WT for further experiments. (**b**) Uptake of FePt NPs was assayed by ICP-OES.

**
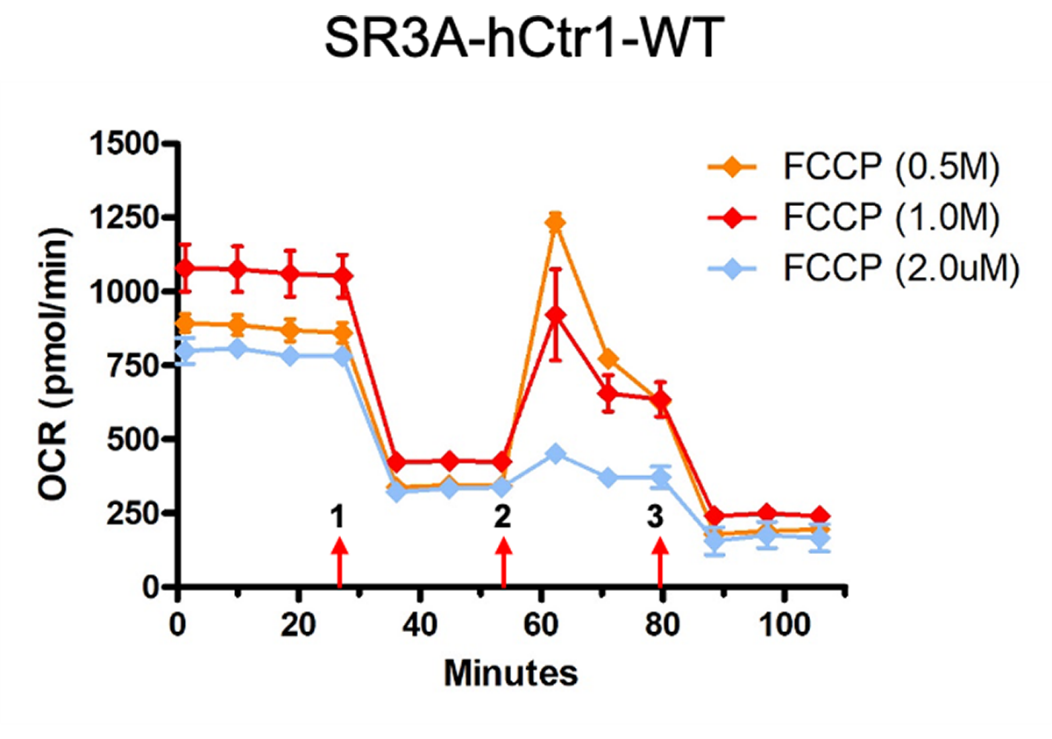
**

**Supplementary Fig. S4** Validation of different concentrations of FCCP (0.5, 1.0 and 2.0 μM) for optimizing the oxygen consumption rate in SR3A-hCtr1-WT cell.
